# Supplementary material for: Simplifying the detection and monitoring of protein glycosylation during in vitro glycoengineering
Source: PubMed Central journal article supplement (PMC9834283; doi:10.1038/s41598-023-27634-z), 2023-01-11
Supplement: 41598_2023_27634_MOESM1_ESM.pdf [file 41598_2023_27634_MOESM1_ESM.pdf]

# Simplifying the detection and monitoring of protein glycosylation during in vitro glycoengineering

Matthew J. Saunders<sup>1</sup>, Robert J. Woods<sup>2</sup> and \*Loretta Yang<sup>1</sup>

<sup>1</sup>Lectenz Bio, 111 Riverbend Rd, Athens, GA 30602

<sup>2</sup>Complex Carbohydrate Research Center, University of Georgia, 315 Riverbend Rd, Athens, GA 30602

\*Corresponding author

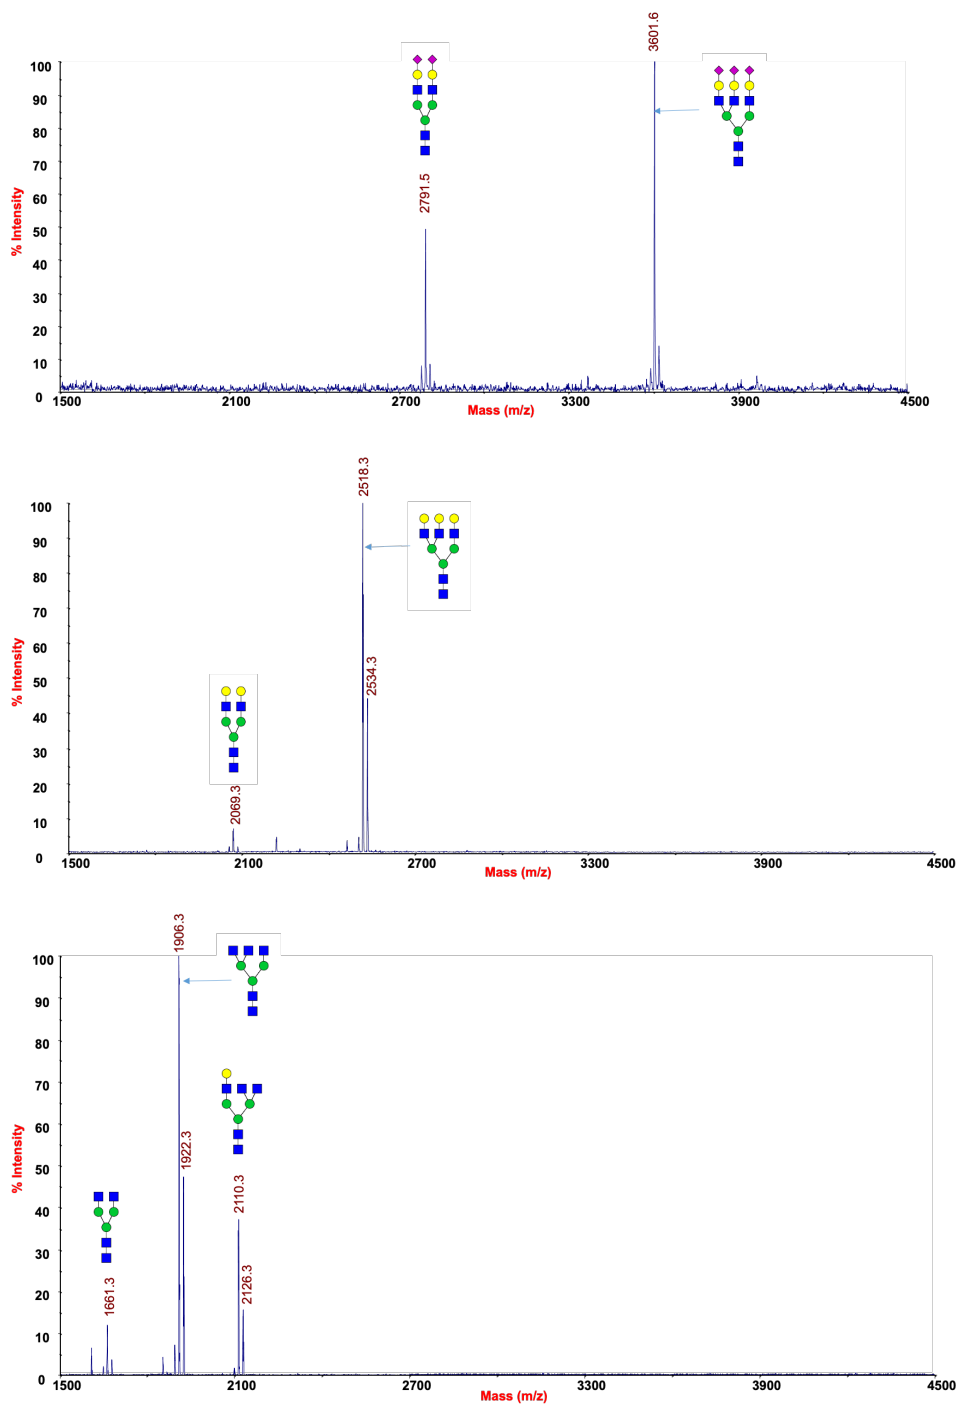

**Figure S1.** N-glycans released from fetuin sequentially treated with first Sialidase A and subsequently with  $\beta$ 1,3-Galactosidase and  $\beta$ 1,4-Galactosidase S, determined using MALDI-TOF, corresponding to the t = 0 (upper), 60 (middle), and 180 minute (lower) time points in Figure 5 (upper panel).
